# Supplementary material
Source: PubMed Central journal article supplement (PMC9705693)
Supplement: jmb-31-1-130-supple.pdf [file jmb-31-1-130-supple.pdf]

**Supplementary Table S1.** List of 65 fatty acids from this study. Nine fatty acids indicated as **bold** were selected for further screening.

| No. | Name                                         | MW    | CAS         |
|-----|----------------------------------------------|-------|-------------|
| 1   | <b>Decanoic acid</b>                         | 172.3 | 334-48-5    |
| 2   | <b>Undecanoic acid</b>                       | 186.3 | 112-37-8    |
| 3   | 10-Undecenoic acid                           | 184.3 | 112-38-9    |
| 4   | <b>Lauric acid (Dodecanoic acid)</b>         | 200.3 | 143-07-7    |
| 5   | 11-Dodecenoic acid                           | 198.3 | 65423-25-8  |
| 6   | <b>N-tridecanoic acid (tridecanoic acid)</b> | 214.3 | 638-53-9    |
| 7   | <b>12-Methoxydodecanoic acid</b>             | 230.3 | 92169-28-3  |
| 8   | 12-Tridecenoic acid                          | 212.3 | 6006-06-0   |
| 9   | <b>Myristic acid (Tetradecanoic acid)</b>    | 228.4 | 544-63-8    |
| 10  | 9(Z)-Tetradecenoic acid                      | 226.4 | 544-64-9    |
| 11  | 9(E)-Tetradecenoic acid                      | 226.4 | 544-64-9    |
| 12  | <b>Pentadecanoic acid</b>                    | 242.4 | 1002-84-2   |
| 13  | 10(Z)-Pentadecenoic acid                     | 240.4 | 84743-29-3  |
| 14  | 10(E)-Pentadecenoic acid                     | 240.4 | 321744-58-5 |
| 15  | Hexadecanoic acid                            | 256.4 | 57-10-3     |
| 16  | 9(Z)-Hexadecenoic acid                       | 254.4 | 373-49-9    |
| 17  | 9(E)-Hexadecenoic acid                       | 254.4 | 10030-73-6  |
| 18  | <b>Heptadecanoic acid</b>                    | 270.5 | 506-12-7    |
| 19  | 10(Z)-Heptadecenoic acid                     | 268.4 | 29743-97-3  |
| 20  | 10(E)-Heptadecenoic acid                     | 268.4 | 126761-43-1 |
| 21  | Octadecanoic acid                            | 284.5 | 57-11-4     |
| 22  | 6(Z)-Octadecenoic acid                       | 282.5 | 593-39-5    |
| 23  | 6(E)-Octadecenoic acid                       | 282.5 | 593-40-8    |
| 24  | 9(Z)-Octadecenoic acid                       | 282.5 | 112-80-1    |
| 25  | <b>Eliadic acid (9(E)-Octadecenoic acid)</b> | 282.5 | 112-79-8    |
| 26  | 11(Z)-Octadecenoic acid                      | 282.5 | 506-17-2    |
| 27  | 11(E)-Octadecenoic acid                      | 282.5 | 693-72-1    |
| 28  | 9(Z), 11(Z)-octadecadienoic acid             | 280.4 | 60-33-3     |
| 29  | (9Z,11E)-Octadecadienoic acid                | 280.4 | 2540-56-9   |
| 30  | 9(E),12(E)-Octadecadienoic acid              | 280.4 | 506-21-8    |
| 31  | 9(Z), 12(Z), 15(Z)-Octadecatrienoic acid     | 278.4 | 463-40-1    |
| 32  | 6(Z), 9(Z), 12(Z)-Octadecatrienoic acid      | 278.4 | 506-26-3    |
| 33  | Nonadecanoic acid                            | 298.5 | 646-30-0    |
| 34  | 7(Z)-Nonadecenoic acid                       | 296.5 | 118020-79-4 |
| 35  | 7(E)-Nonadecenoic acid                       | 296.5 | 191544-99-7 |
| 36  | 10(Z)-Nonadecenoic acid                      | 296.5 | 73033-09-7  |
| 37  | 10(E)-Nonadecenoic acid                      | 296.5 | 147527-21-7 |

|    |                                                             |       |             |
|----|-------------------------------------------------------------|-------|-------------|
| 38 | 10(Z),13(Z)-Nonadecadienoic acid                            | 294.5 | 29204-20-4  |
| 39 | 6(Z), 9(Z), 12(Z), 15(Z)-Octadecatetraenoic acid            | 276.4 | 115610-41-8 |
| 40 | Eicosanoic acid                                             | 312.5 | 506-30-9    |
| 41 | 11(E)-Eicosenoic acid                                       | 310.5 | 62322-84-3  |
| 42 | 8(Z)-Eicosenoic acid                                        | 310.5 | 76261-96-6  |
| 43 | 11(Z)-Eicosenoic acid                                       | 310.5 | 5561-99-9   |
| 44 | 5(Z)-Eicosenoic acid                                        | 310.5 | 7050-07-9   |
| 45 | 5(Z), 8(Z)-Eicosadienoic acid                               | 308.5 | 125535-07-1 |
| 46 | 5(Z),8(Z)-7Dimethyleicosadienoic acid                       | 336.6 | 89560-01-0  |
| 47 | 11(Z), 14(Z)-Eicosadienoic acid                             | 308.5 | 2091-39-6   |
| 48 | 5(Z), 8(Z), 11(Z)-Eicosatrienoic acid                       | 306.5 | 20590-32-3  |
| 49 | 8(Z), 11(Z), 14(Z)-Eicosatrienoic acid                      | 306.5 | 1783-84-2   |
| 50 | 11(Z), 14(Z), 17(Z)-Eicosatrienoic acid                     | 306.5 | 2091-27-2   |
| 51 | 5(Z), 8(Z), 11(Z), 14(Z)-Eicosatetraenoic acid              | 304.5 | 506-32-1    |
| 52 | 5(Z), 8(Z), 11(Z), 14(Z), 17(Z)-Eicosapentaenoic acid       | 302.5 | 10417-94-4  |
| 53 | Heneicosanoic acid                                          | 326.6 | 2363-71-5   |
| 54 | 12(Z) Heneicosenoic acid                                    | 324.5 | 3515-84-2   |
| 55 | 13(Z)-Docosenoic acid                                       | 338.6 | 112-86-7    |
| 56 | 13(E)-Docosenoic acid                                       | 338.6 | 506-33-2    |
| 57 | 13(Z),16(Z)-Docosadienoic acid                              | 336.6 | 17735-98-7  |
| 58 | 13(Z), 16(Z), 19(Z)-Docosatrienoic acid                     | 334.5 | 28845-86-5  |
| 59 | 7(Z), 10(Z), 13(Z), 16(Z)-Ocosatetraenoic acid              | 332.5 | 28874-58-0  |
| 60 | 7(Z), 10(Z), 13(Z), 16(Z), 19(Z)-Docosapentaenoic acid      | 330.5 | 2234-74-4   |
| 61 | 4(Z), 7(Z), 10(Z), 13(Z), 16(Z), 19(Z)-Docosahexaenoic acid | 328.5 | 6217-54-5   |
| 62 | 14(Z)-Tricosenoic acid                                      | 352.6 | 105305-008  |
| 63 | 14(E)-Tricosenoic acid                                      | 352.6 | 164414-85-1 |
| 64 | Tetracosanoic acid                                          | 368.6 | 557-59-5    |
| 65 | 15(Z)-Tetracosenoic acid                                    | 366.6 | 506-37-6    |

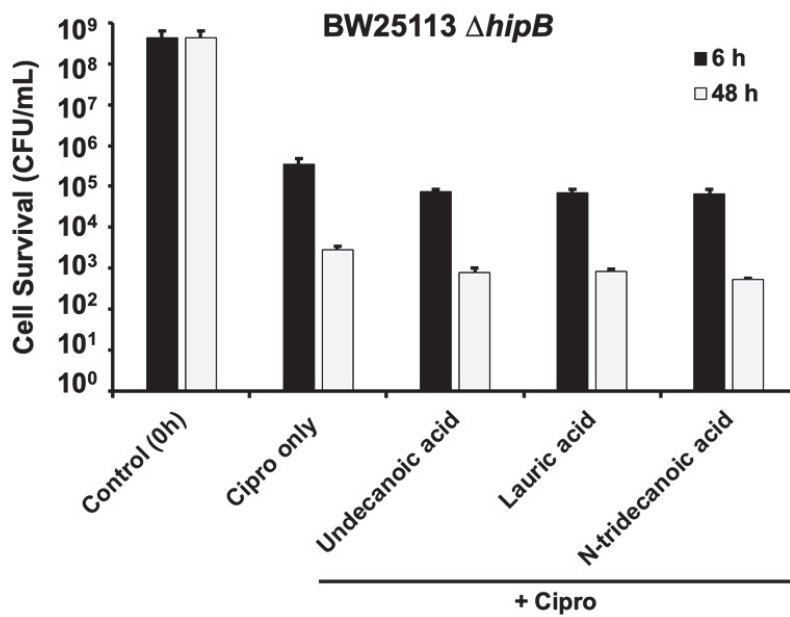

**Supplementary Figure S1. Persister formation of *hipB* mutant.** Exponentially grown BW25113  $\Delta$ *hipB* cells were exposed to 5  $\mu$ g/ml of ciprofloxacin and 1 mM of undecanoic acid, lauric acid, and N-tridecanoic acid for 6 and 48 h in LB medium. Error bars indicate the standard deviation of two independent cultures with three replicates.

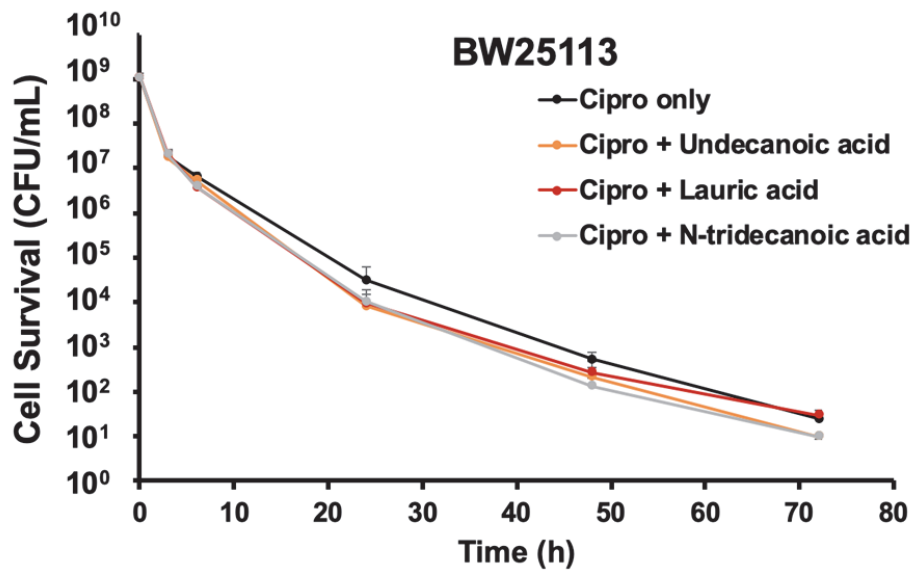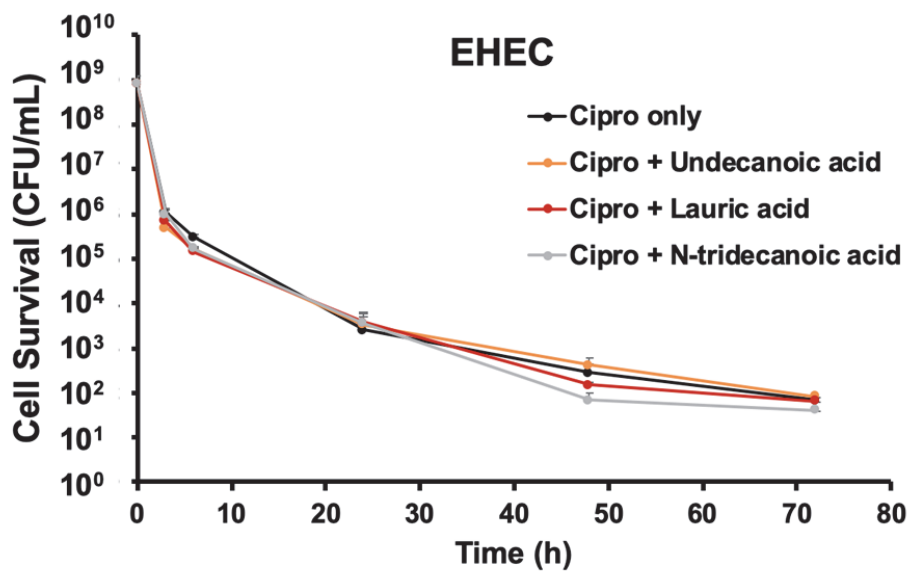

**Supplementary Figure S2. Stationary phase persister cell formation.** Overnight *E. coli* BW25113 and EHEC cells were exposed to 5  $\mu\text{g/ml}$  of ciprofloxacin and 1 mM of undecanoic acid, lauric acid, and N-tridecanoic acid for 3, 6, 24, 48, and 72 h in LB medium. Error bars indicate the standard deviation of two independent cultures with three replicates.
